# Supplementary material
Source: PubMed Central journal article supplement (PMC3694501)
Supplement: NIHMS454782-supplement-supplement_1.pdf [file NIHMS454782-supplement-supplement_1.pdf]

**Supplementary Table 1: Primer sequences for *INF2***

| <b>Primer Name</b> | <b>Primer Sequence</b> |
|--------------------|------------------------|
| INF2_2F            | ATGGCACGTGAGCAGGAAT    |
| INF2_2R            | GGCCTGAAGCCTCATACCA    |
| INF2_3-4F          | TGCACAGGCATGGGAAG      |
| INF2_3-4R          | GGATGCAGCATGGGATG      |
| INF2_5F            | GGTGGCAGAAGTGAAATGG    |
| INF2_5R            | GTGCTGCTTAGGTGAGGTGG   |
| INF2_6F            | AGGTCGCTATCCCTGGCTAT   |
| INF2_6R            | CCTGGAGTCTCACCCCAA     |
| INF2_7F            | CAGGCCACAGTCCTTAGTCC   |
| INF2_7R            | CTAAGACCTCAGTGTCTGCCC  |
| INF2_8.1F          | GCTTTTTCCTGCCTCTTCT    |
| INF2_8.1R          | GCGAAACTTTTCAGGATGCTC  |
| INF2_8.2F          | AAAACACTACAACCCCAAGC   |
| INF2_8.2R          | CCACGATGACCTCCTCCAT    |
| INF2_8.3F          | CAGGCTCCTGTGAGTTCCTG   |
| INF2_8.3R          | GCGCACACAAGTTCCATGT    |
| INF2_9-10F         | GCAGGACATCCTTTAGACCC   |
| INF2_9-10R         | CAAGTCAGAAGGCTCAGGTG   |
| INF2_11-12F        | CCATGACTACGTGGGGAAAC   |
| INF2_11-12R        | CCTGCTCCCTATTCTCTGCT   |
| INF2_13F           | TCTGGAGGAATTGGATCCTG   |
| INF2_13R           | AGGTGCTCTTAGCAGCCATT   |
| INF2_14-15F        | GCCCTGTCTGTGATCCTT     |
| INF2_14-15R        | ATGGCCTCTACGCCTCTACA   |
| INF2_16F           | TCCCAGGTGGAGAGTATGA    |
| INF2_16R           | ACTGCCTGGGGACAGAAGT    |
| INF2_17F           | CGTGCAGCCTCAGAGTACAG   |
| INF2_17R           | AGGAGACAGCACAGCCACTC   |
| INF2_18F           | TTGTCAGAGACCACCGTCT    |
| INF2_18R           | GACCCCACTCTAGCCAGACA   |
| INF2_19F           | CACAGCCTGTCTGGCTAGAGT  |
| INF2_19R           | CAGACAAGGATCCCAGAGTCA  |
| INF2_20F           | CTGGGATCCTTGTCTGTGCT   |
| INF2_20R           | GGCTTTCCAGTGAAGTCAGG   |
| INF2_21.1F         | CATCAGAGGAGGCTTTCTGG   |
| INF2_21.1R         | GCATCTTGCTTGAAGTTCC    |
| INF2_21.2F         | CCTCAAGTTCTCCAGCAACC   |
| INF2_21.2R         | CACCCAAGTCACCTCTCCTG   |
| INF2_22F           | TGGCTTAGTGGCCAGAGAAC   |
| INF2_22R           | GAGAGAAGCCAGGTTAGTGTCC |
| INF2_23F           | GCACCTGATATTGTACCCAGC  |
| INF2_23R           | GCACGGAGTTTTGGTTTCC    |

**Supplementary Table 2:** Known and new INF2 variants in patients with FSGS

| RS number  | Exon/Intron | Nucleotide | Amino Acid Change |
|------------|-------------|------------|-------------------|
| rs4983530  | 2           | 105C>T     | None              |
| New        | 2           | 279C>T     | None              |
| New        | 4           | 549C>G     | N183K             |
| rs75115369 | Intron 2    | (+)6C>T    | None              |
| New        | Intron 3    | (+)7 G>A   | None              |
| New        | 8           | 1078G>A    | V360L             |
| New        | 8           | 1640G>A    | G547D             |
| rs59751492 | 15          | 2322C>T    | None              |
| rs62640005 | 17          | 2571C>T    | None              |
| rs10133301 | 18          | 2640T>C    | None              |
| rs73347508 | Intron 18   | (+15)C>T   | None              |
| rs4983535  | 21          | 3066T>C    | None              |
| rs75382114 | 21          | 3069C>T    | None              |
| New        | 21          | 3108T>C    | None              |
| rs1128840  | 21          | 3207A>C>G  | None              |
| rs34251364 | 21          | 3286C>T    | P1095S            |
| rs9672065  | 21          | 3478G>A    | G1160S            |
